# Supplementary material for: Membrane activity profiling of small molecule B. subtilis growth inhibitors utilizing novel duel-dye fluorescence assay
Source: Royal Society of Chemistry journal article supplement (doi:10.1039/c8md00009c), 2018-01-01
Supplement: c8md00009c1.pdf [file c8md00009c1.pdf]

## Membrane activity profiling of small molecule *B. subtilis* growth inhibitors utilizing novel dual-dye fluorescence assay

### Electronic Supplemental Information

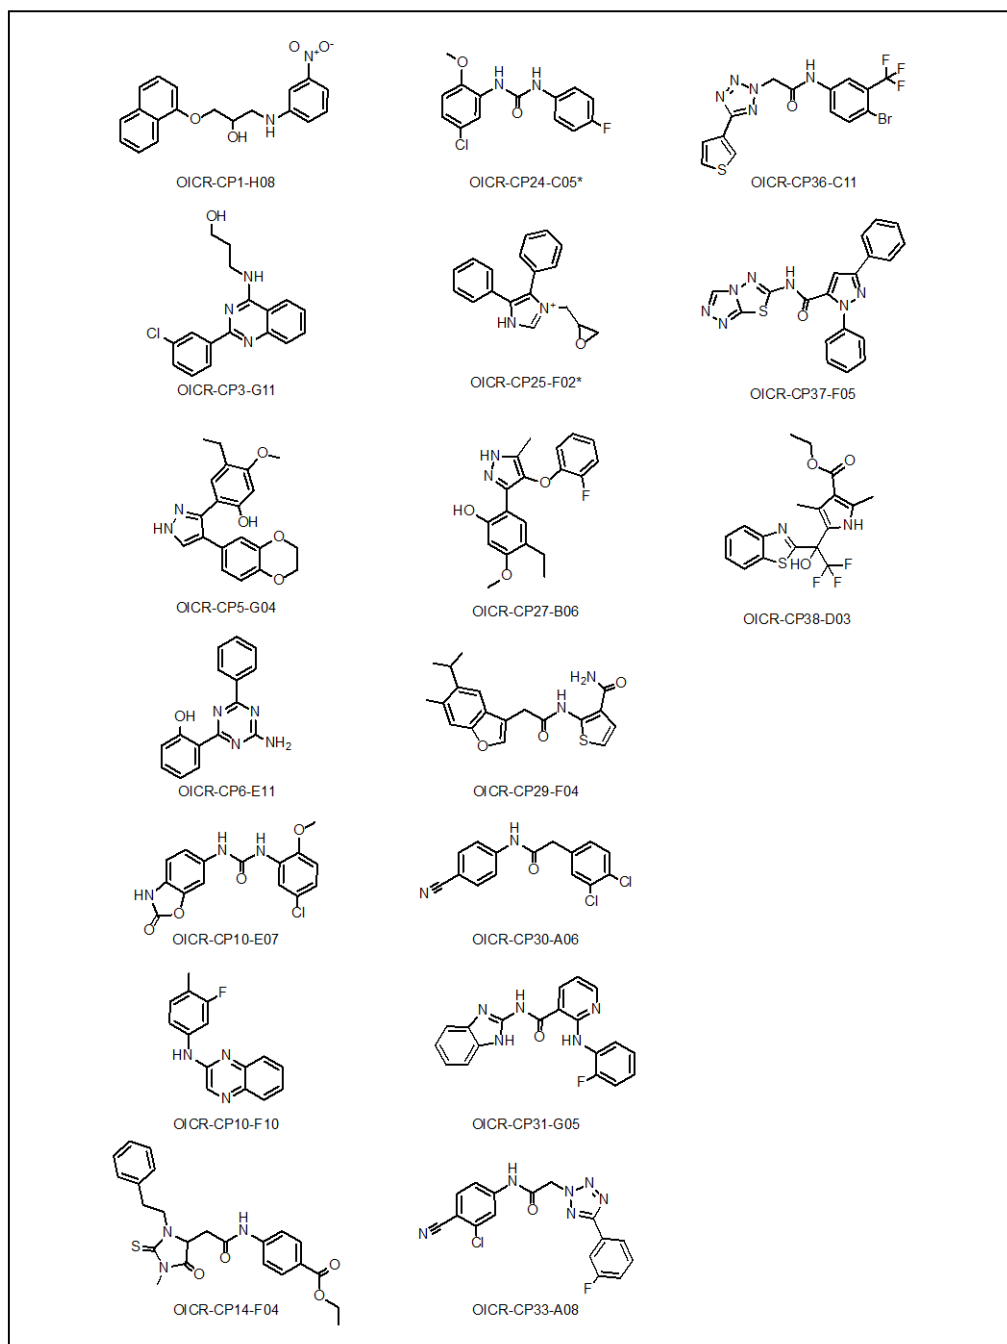

**Fig S1:** Chemical structures of the significant membrane permeability hits with the corresponding library identifiers. Those with \* indicate compounds with both significant activity against membrane potential and membrane permeability.

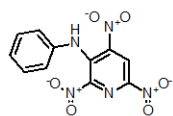

OICR-CP1-C03

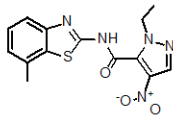

OICR-CP7-B05

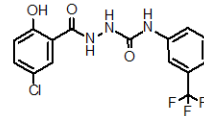

OICR-CP19-H09

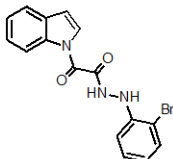

OICR-CP2-D10

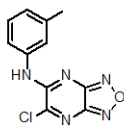

OICR-CP7-E04

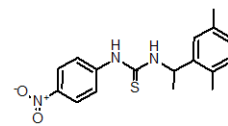

OICR-CP20-B09

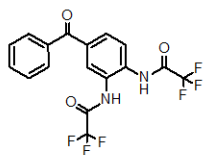

OICR-CP3-E02

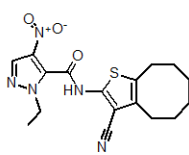

OICR-CP7-E11

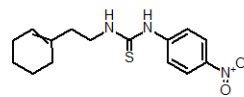

OICR-CP20-E08

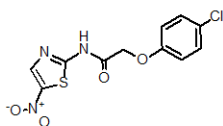

OICR-CP3-F06

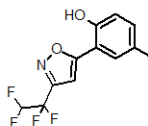

OICR-CP16-F09

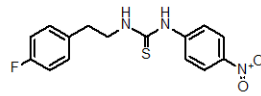

OICR-CP20-E11

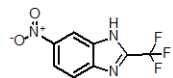

OICR-CP3-H10

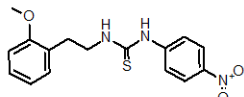

OICR-CP19-B07

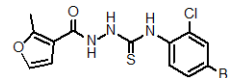

OICR-CP20-F09

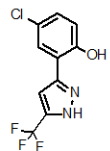

OICR-CP6-D02

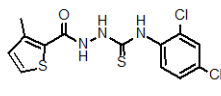

OICR-CP19-C09

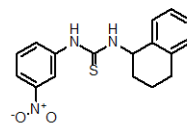

OICR-CP21-B05

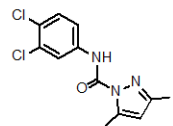

OICR-CP6-E02

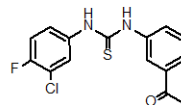

OICR-CP19-F07

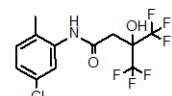

OICR-CP21-D02

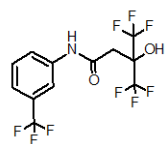

OICR-CP21-E03

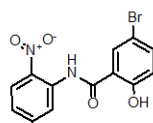

OICR-CP23-H02

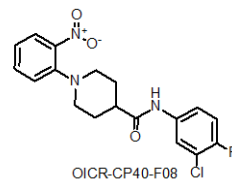

OICR-CP40-F08

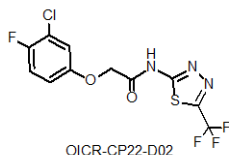

OICR-CP22-D02

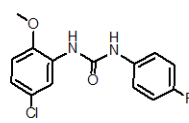

OICR-CP24-C05\*

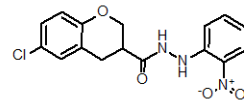

OICR-CP40-H11

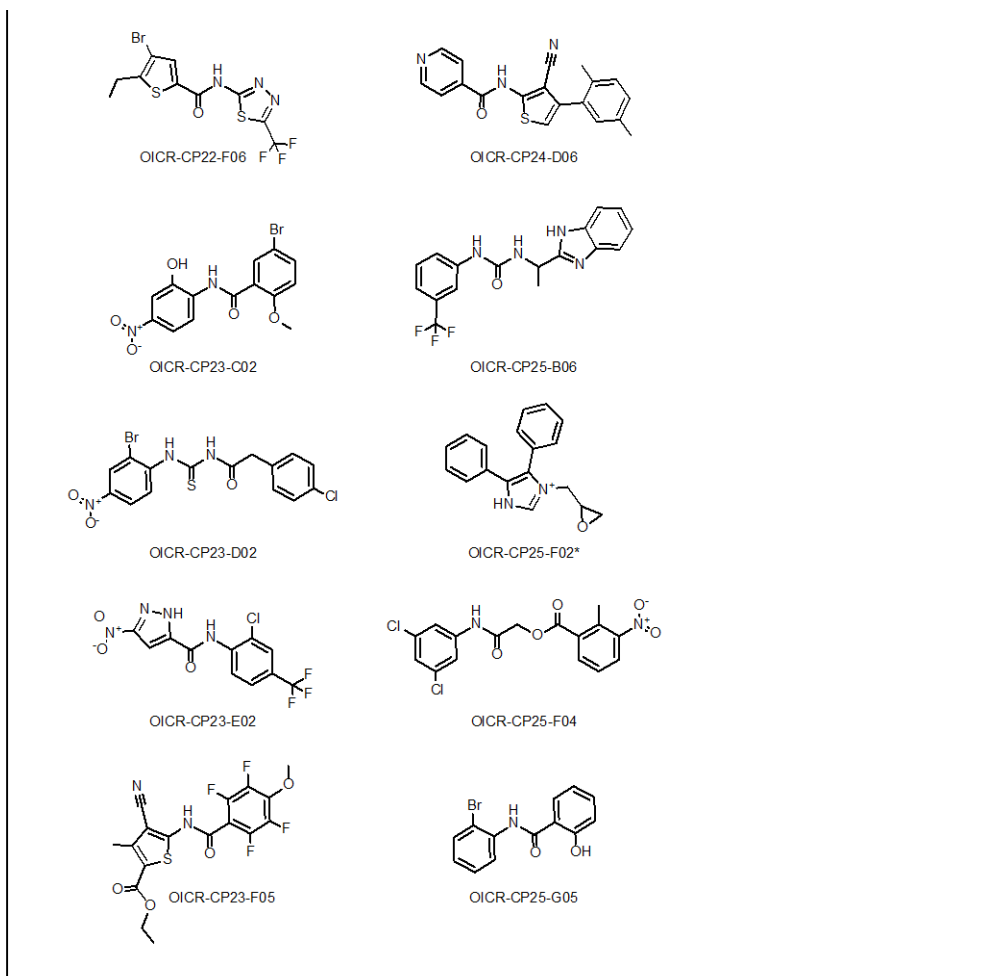

**Fig S2:** Chemical structures of the significant membrane potential hits with the corresponding library identifiers. Those with \* indicate compounds with both significant activity against membrane potential and membrane permeability.

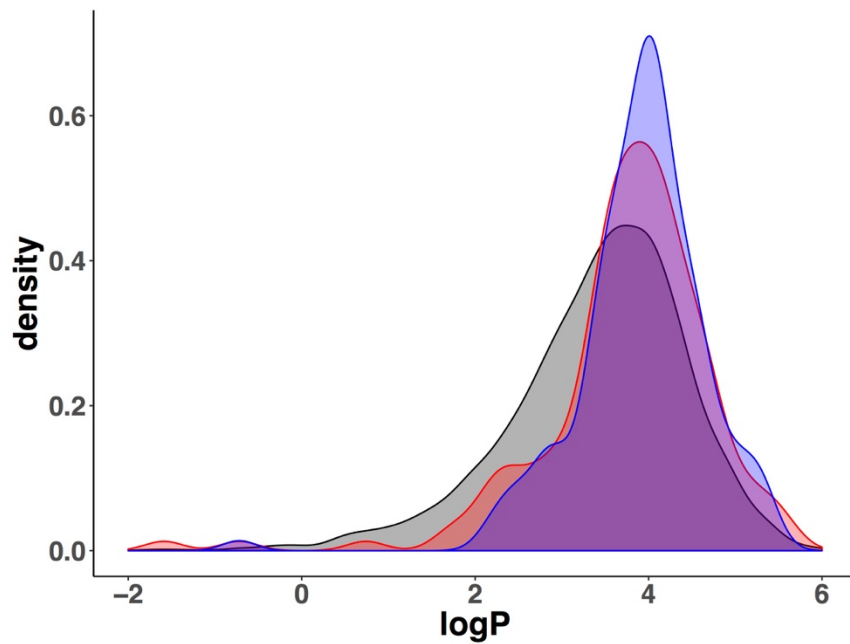

**Fig S3:** Density plot of the calculated logP values for the whole sub-library (black), the highly active membrane potential hits (red) and the highly active membrane permeability hits (blue).
